# Supplementary material for: Thermal- and salt-activated shape memory hydrogels based on a gelatin/polyacrylamide double network
Source: PubMed Central journal article supplement — RSC Adv. 2019 Jun 13;9(32):18619–26. doi: 10.1039/c9ra02842k (PMC9064822; doi:10.1039/c9ra02842k), 2019-06-13
Supplement: RA-009-C9RA02842K-s001.pdf [file RA-009-C9RA02842K-s001.pdf]

Supporting information for

## Thermal- and Salt-Activated Shape Memory Hydrogels Based on Gelatin/Polyacrylamide

### Double Network

Fang Chen,<sup>a</sup> Kaixiang Yang,<sup>a</sup> Dinglei Zhao,<sup>a</sup> and Haiyang Yang<sup>\*a</sup>

<sup>a</sup> CAS Key Laboratory of Soft Matter Chemistry, School of Chemistry and Materials Science,  
University of Science and Technology of China, Hefei 230026,  
China.

E-mail: yhy@ustc.edu.cn

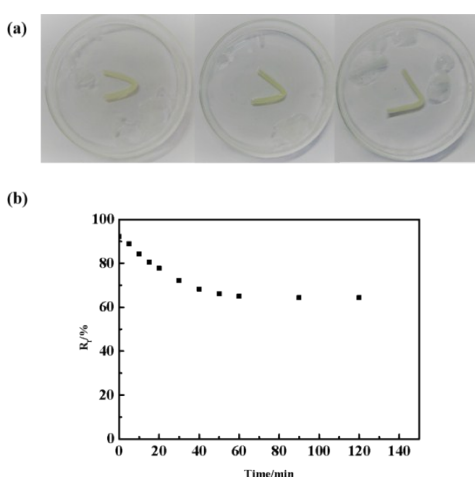

**Fig. S1** (a) The shape transition of the hydrogel with time at freezing temperature. (b) Shape fixity ratio ( $R_f$ ) of the hydrogel shown as a function of time at freezing temperature.

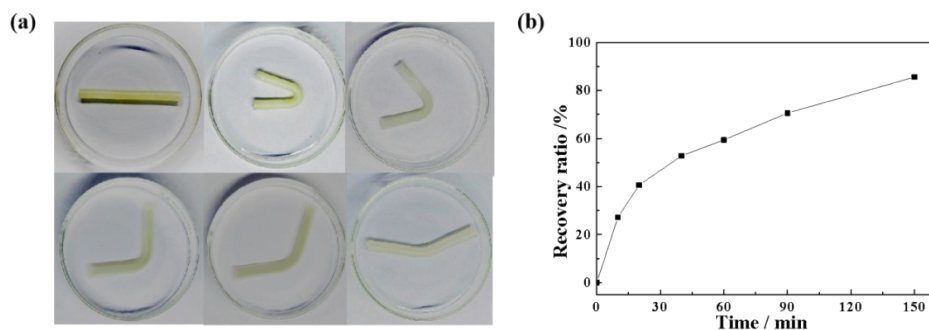

**Fig. S2** (a) Images demonstrating the transition of the hydrogel from the temporary shape to the permanent shape for the salt-activated SME. (b) Shape recovery ratio ( $R_r$ ) for G10AM3 hydrogels shown as a function of time at room temperature.

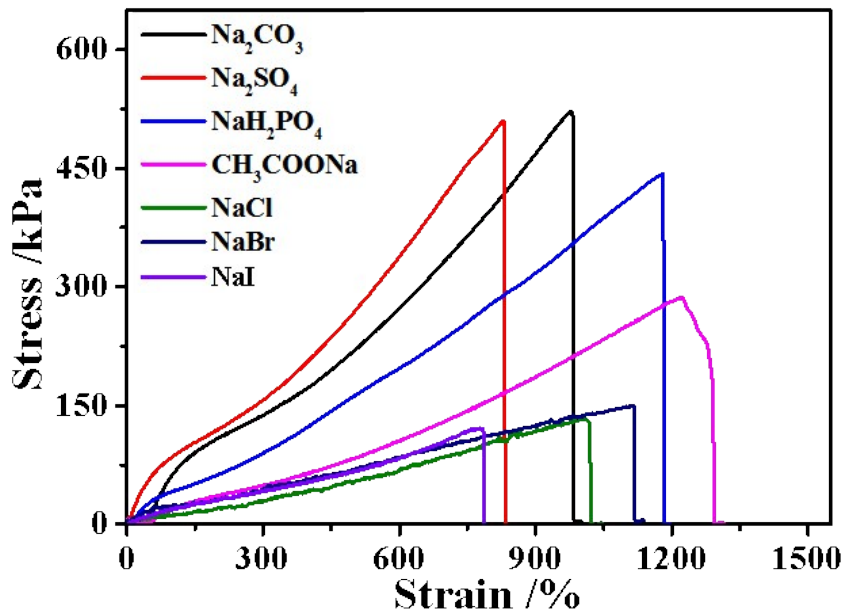

**Fig. S3** Tensile stress-strain curves of hydrogels treated with solutions containing different anions at room temperature.

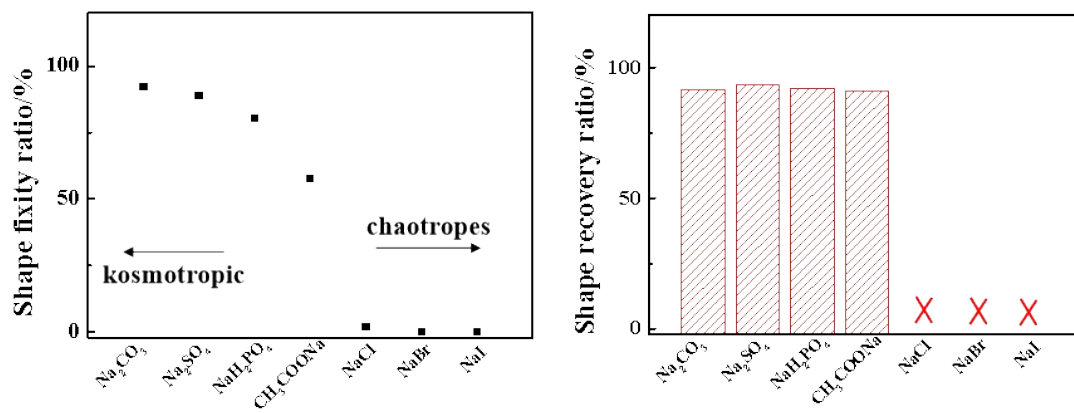

**Fig. S4** (a)  $R_f$  for hydrogels treated with solutions that containing different anions at room temperature. (b)  $R_r$  for hydrogels treated with solutions containing different anions at room temperature.

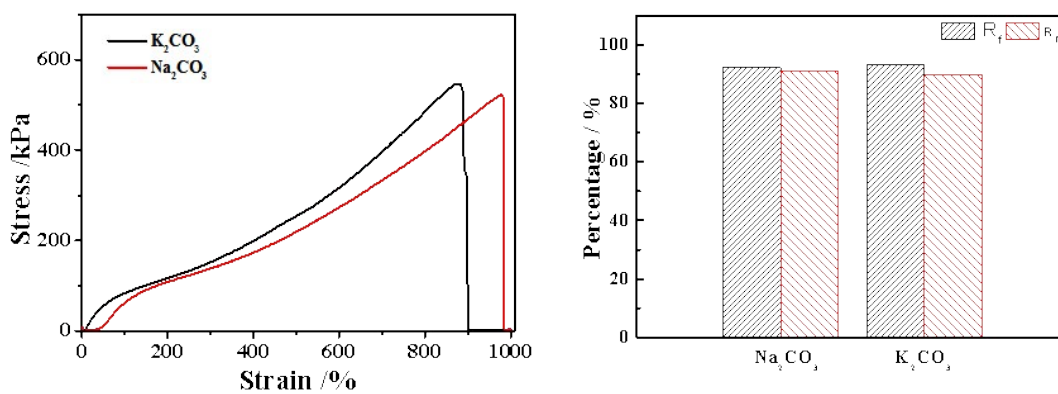

**Fig. S5** (a) Tensile stress-strain curves of hydrogels treated with solutions containing different cations at room temperature. (b)  $R_f$  and  $R_r$  for hydrogels treated with solutions containing different cations at room temperature.
